# Supplementary material for: Molecular basis of 5-hydroxytryptophan synthesis in Saccharomyces cerevisiae
Source: Royal Society of Chemistry journal article supplement (doi:10.1039/c5mb00888c), 2016-03-18
Supplement: c5mb00888c1.pdf [file c5mb00888c1.pdf]

## Supplementary Information

### **Molecular basis of 5-hydroxytryptophan synthesis in *Saccharomyces cerevisiae***

Jiantao Zhang<sup>†</sup>, Chaochen Wu<sup>†</sup>, Jiayuan Sheng<sup>†</sup>, Xueyang Feng<sup>\*</sup>

Department of Biological Systems Engineering, Virginia Polytechnic Institute and  
State University, Blacksburg, VA 24061

<sup>†</sup> Jiantao Zhang, Chaochen Wu and Jiayuan Sheng contributed equally to this work.

<sup>\*</sup> To whom correspondence should be addressed. X.F: Phone: (540) 231-2974. E-mail:  
xueyang@vt.edu.

**Table S1** The plasmids used in this study.

| Name | Description                                                                            |
|------|----------------------------------------------------------------------------------------|
| H1   | pRS415-tef1p-XcP4He-tef1t-tpi1p-dfr1-tpi1t-pdc1p-phhb-pdc1t                            |
| H2   | pRS415-tef1p-XcP4He-tef1t-tpi1p-folm-tpi1t-pdc1p-phhb-pdc1t                            |
| H3   | pRS415-tef1p-XcP4He-tef1t                                                              |
| H4   | pRS416-tpi1p-dfr1-tpi1t-pdc1p-phhb-pdc1t                                               |
| H5   | pRS416-tpi1p-folm-tpi1t-pdc1p-phhb-pdc1t                                               |
| H6   | pRS415-tef1p-BpP4H-tef1t                                                               |
| H7   | pRS415-tef1p-McP4H-tef1t                                                               |
| H8   | pRS415-tef1p-OcT5H-tef1t                                                               |
| H9   | pRS415-tef1p-SmT5H-tef1t                                                               |
| H10  | pRS415-tef1p-OcP4H-tef1t                                                               |
| H11  | pRS415-tef1p-HsT3H-tef1t                                                               |
| H12  | pRS416-tpi1p-gch-tpi1t-fba1p-pts-fba1t-gpdp-spr-gpdt-gpm1p-dhpr-gpm1t-pdc1p-phhb-pdc1t |

**Table S2** The primers used in this study.

| Name          | Sequence (5'-3')                                             |
|---------------|--------------------------------------------------------------|
| pRS-TEF1p-F   | CAGTGAGCGCGTAATACGACTCACTATAGGGCGAATTGATAGCTTCAAAATGTTTCTA   |
| TS-TEF1p-R    | CATTAAAGCTCAATGAGCCATTTTGTAAATAAAACCTAGATTAGATTGC            |
| TEF1p-TS-F    | CAATCTAATCTAAGTTTAAATTACAAAATGGCTCAATTGAGCTTAAATGC           |
| TEF1t-TS-R    | CTAGAAAAGTCTTATCAATCTCCTCATACTTGAATCGGGTCTATGTATAC           |
| TS-TEF1t-F    | ACATAGACCCGATTCAAGTATGAGGAGATTGATAAGACTTTTCTAGTTGC           |
| pRS-TEF1t-R   | AAGGGAACAAAAGCTGGAGCTCCACCGCGGTGGCGGCCGCGATAGCGCCGATCAAAGTAT |
| pRS-TPI1p-F   | CAGTGAGCGCGTAATACGACTCACTATAGGGCGAATTGTATATCTAGGAACCCATCAG   |
| GGPPS-TPI1p-R | AAGTAGTTGTCGAAATATGACATTTTATGTTTATGTATGTGTTTTTGTAA           |
| TPI1p-GGPPS-F | TTAAATCTATAACTACAAAAACACATACATAAACTAAAAATGTCATATTCGACAACATA  |
| TPI1t-GGPPS-R | AGATAATATTTTATATAATTATATTAATCCTACTTTCTTCTTAATTGTGAAT         |
| GGPPS-TPI1t-F | ATTCACAATTAGAAGAAGAAAGTAGGATTAATATAATTATATAAAAAATATTATCT     |
| pRS-TPI1t-R   | AAGGGAACAAAAGCTGGAGCTCCACCGCGGTGGCGGCCGCTATATAACAGTTGAAATTTG |
| PDC1p-TPI1t-R | GAACATATGCTCACCCAGTCGCATGTATATAACAGTTGAAATTTGGATAA           |
| TPI1t-PDC1p-F | TTATCCAAATTTCAACTGTTATATACATGCGACTGGGTGAGCATATGTTC           |
| tHMGR-PDC1p-R | CTTCAGTTTTACCAATTGGTCCATTTTGATTGATTGACTGTGTTATTT             |
| PDC1p-tHMGR-F | AAATAACACAGTCAAATCAATCAAAATGGACCAATTGGTGAAAACCTGAAG          |
| PDC1t-tHMGR-R | TAACTAATAATTAGAGATTAATCGCTTAGGATTAATGCAGGTGACGG              |
| tHMGR-PDC1t-F | CCGTCACCTGCATTAATCCTAAGCGATTTAATCTCTAATTATTAGTTAA            |
| pRS-PDC1t-R   | AAGGGAACAAAAGCTGGAGCTCCACCGCGGTGGCGGCCGCGCAGTTTGAATTGAGTAA   |
| ENO2p-PDC1t-R | CTTCTATACCCGAGCGTCGACACGGCAGTTTTGAATTGAGTAACCATT             |
| PDC1t-ENO2p-F | AATGGTTACTCAATTCAAAACTGCCGTGTCGACGCTGCGGGTATAGAAAAG          |
| ERG20-ENO2p-R | TCCTAATTTCTTTTTCTGAAGCCATTATTATTGTATGTTATAGTATTAGTTGCTT      |
| ENO2p-ERG20-F | AAGCAACTAATACTATAACATACAATAAATAGGCTTCAGAAAAAGAAATTAGGA       |
| ENO2t-ERG20-R | GACTAATAATTCTTAGTTAAAAGCACTCTATTTGCTTCTCTGTAAACTTTG          |

|               |                                                               |
|---------------|---------------------------------------------------------------|
| ERG20-ENO2t-F | CAAAGTTTACAAGAGAAGCAAATAGAGTGCTTTTAACTAAGAATTATTAGTC          |
| pRS-ENO2t-R   | AAGGGAACAAAAGCTGGAGCTCCACCGCGGTGGCGGCCGCAGGTATCATCTCCATCTCCC  |
| TEF1p-GDH1-F  | AAAGAAAGCATAGCAATCTAATCTAAGTTTAAATTACAAAATGTCAGAGCCAGAATTCA   |
| TEF1t-GDH1-R  | ATATAAAAGATATGCAACTAGAAAAGTCTTATCAATCTCCTTAAATACATCACCTTGGT   |
| GDH1-K74V-F   | CCGCCAAGGGTCCATACGTTGGTGGTCTACGTTTCCATCC                      |
| GDH1-K74V-R   | GGATGAAACGTAGACCACCAACGTATGGACCCTTGGCGG                       |
| GDH1-T177S-F  | CTCCTGGGAAGGTGTCTTATCTGGTAAGGGTTTGAAGTGG                      |
| GDH1-T177S-R  | CCAGTTCAAACCCTTACCAGATAAGACACCTTCCCAGGAG                      |
| TEF1p-GDH2-F  | AAAGAAAGCATAGCAATCTAATCTAAGTTTAAATTACAAAATGGATCAGACATATTCTCT  |
| TEF1t-GDH2-R  | ATATAAAAGATATGCAACTAGAAAAGTCTTATCAATCTCCTTAAATCACACCCTGCGCCA  |
| GDH2-K92V-F   | CTGCCATCGGCCCGTACGTTGGCGGTATGCGCTTCCATCC                      |
| GDH2-K92V-R   | GGATGGAAGCGCATACCGCCAACGTACGGGCCGATGGCAG                      |
| GDH2-T195S-F  | CAATACCGCCTGCGTCTTCTCTGGTAAGGGCCTTTCATTT                      |
| GDH2-T195S-R  | AAATGAAAGGCCCTTACCAGAGAAGACGCAGGCGGTATTG                      |
| TEF1p-R       | TTTGTAATTAACCTTAGATTAGATTGC                                   |
| TEF1p-XcP4H-F | AAAGAAAGCATAGCAATCTAATCTAAGTTTAAATTACAAAATGAATACTGCCCCAGAAG   |
| TEF1t-XcP4H-R | ATATAAAAGATATGCAACTAGAAAAGTCTTATCAATCTCCCTACACATCACCGTCTCTAG  |
| TEF1t-F       | GGAGATTGATAAGACTTTTCTAGTTGC                                   |
| TPI1p-TEF1t-R | ACGGGTAATCTTCCACCAACCTGATGGGTTTCTAGATATAGATAGCGCCGATCAAAGTAT  |
| TEF1t-TPI1p-F | ATTCGATATTGTCGTAACAAATACTTTGATCGGCGCTATCTATATCTAGGAACCCATCAG  |
| TPI1p-R       | TTTTAGTTTATGTATGTGTTTTTTGTA                                   |
| TPI1p-DFR1-F  | TAAATCTATAACTACAAAAACACATACATAAACTAAAAATGGCTGGAGGAAAGATTCC    |
| TPI1t-DFR1-R  | AAAGAAAAGAAAGATAATATTTTTATATAATTATATTAATCTCATTACGATTGTATAGAG  |
| TPI1t-F       | GATTAATATAATTATATAAAAAATATTATCT                               |
| TPI1p-FolM-F  | TAAATCTATAACTACAAAAACACATACATAAACTAAAAATGGGTAAAACCCAGCCCTT    |
| TPI1t-FolM-R  | AAAGAAAAGAAAGATAATATTTTTATATAATTATATTAATCTTAACGCAGATGACGACCGC |
| PDC1p-R       | TTTGATTGATTGACTGTGTTATTT                                      |
| PDC1p-PCD-F   | TCATAACCTCACGAAAATAACACAGTCAAATCAATCAAATGACCGCACTACCCAAGC     |
| PDC1t-PCD-R   | TGCTTATAAACTTTAACTAATAATTAGAGATTAATCGCTCATTTGCGCCCTCGGCGG     |
| PDC1t-F       | GCGATTTAATCTCTAATTATTAGTTAA                                   |

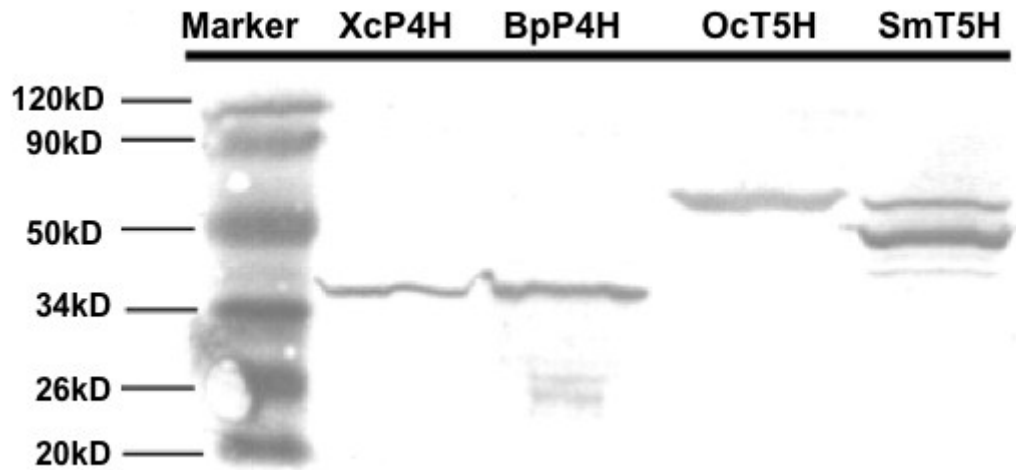

**Figure S1.** Western blot of P4Hs and T5Hs. Two P4Hs, XcP4H (34.0 kD) and BpP4H (33.9 kD), and two T5Hs, OcT5H (58.4 kD) and SmT5H (51.9 kD) were His-tagged and expressed in pRS415 plasmid, followed by yeast protein extraction and western blotting using the previously established protocols<sup>1,2</sup>. The tagged protein was detected by DAB.

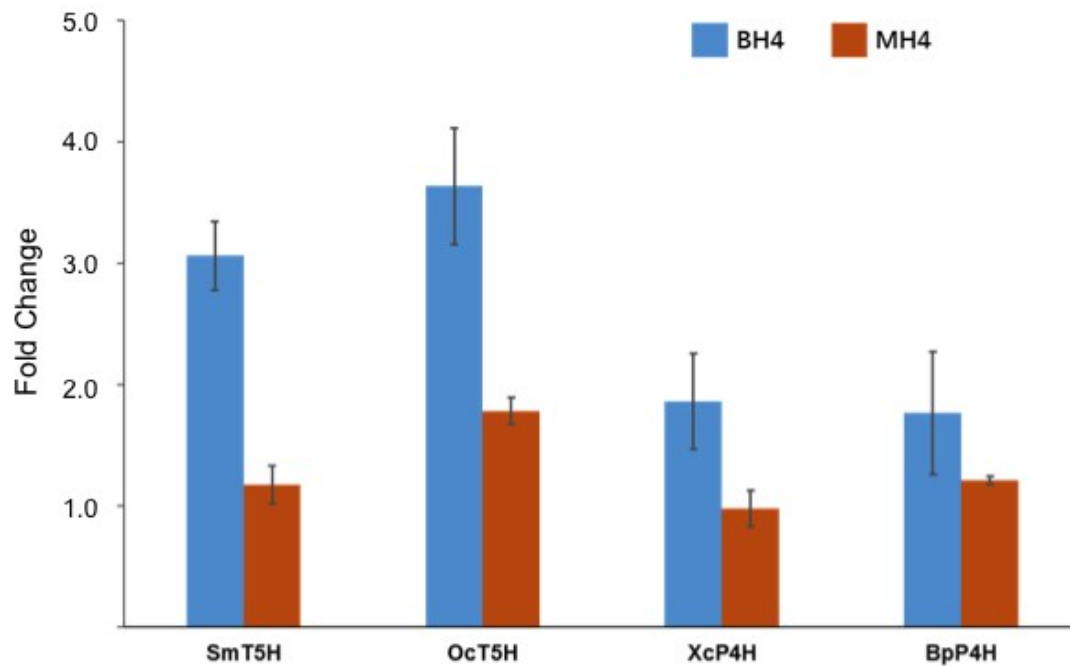

**Figure S2.** *In vitro* enzyme activities of P4Hs and T5Hs. Two P4Hs, XcP4H and BpP4H, and two T5Hs, OcT5H and SmT5H were expressed in pRS415 plasmid, followed by culturing the recombinant yeast strains in the same condition as described in the article and measuring the enzyme activities using a previously established protocol<sup>3</sup>. All of the enzyme activities were normalized to that of XcP4H using MH4 as the cofactor. All of the enzymes demonstrated higher activities when using BH4 as the cofactor. The activities of OcT5H and SmT5H were 50%~75% higher than that of XcP4H and BpP4H when using BH4 as the cofactor.

#### References:

- 1 von der Haar, T. Optimized protein extraction for quantitative proteomics of yeasts. *PLoS One* **2**, e1078, doi:10.1371/journal.pone.0001078 (2007).
- 2 Sheng, J., Huang, L., Zhu, X., Cai, J. & Xu, Z. Reconstitution of the peptidoglycan cytoplasmic precursor biosynthetic pathway in cell-free system and rapid screening of antisense oligonucleotides for Mur enzymes. *Applied microbiology and biotechnology* **98**, 1785-1794, doi:10.1007/s00253-013-5467-8 (2014).
- 3 Moran, G. R. & Fitzpatrick, P. F. A continuous fluorescence assay for tryptophan hydroxylase. *Anal Biochem* **266**, 148-152, doi:10.1006/abio.1998.2956 (1999).
